# Supplementary material for: Combined phototherapy with metabolic reprogramming-targeted albumin nanoparticles for treating breast cancer
Source: Royal Society of Chemistry journal article supplement (doi:10.1039/d2bm01281b), 2022-01-01

Electronic Supplementary Material (ESI) for Biomaterials Science.  
This journal is © The Royal Society of Chemistry 2022

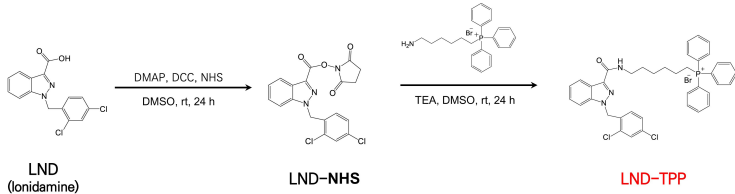

Supplement: d2bm01281b3.pdf [file d2bm01281b3.pdf]
