# Supplementary figures and images for: Combined phototherapy with metabolic reprogramming-targeted albumin nanoparticles for treating breast cancer
Source: Royal Society of Chemistry journal article supplement (doi:10.1039/d2bm01281b), 2022-01-01

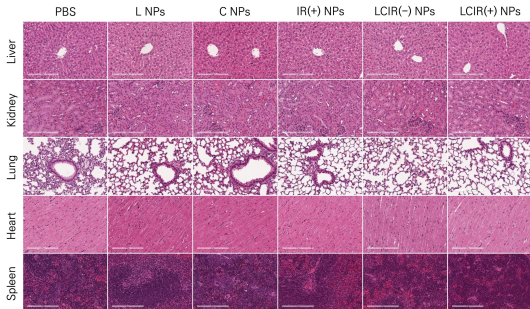

Supplement: d2bm01281b10.pdf [file d2bm01281b10.pdf]

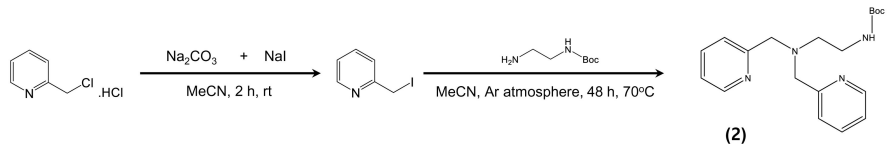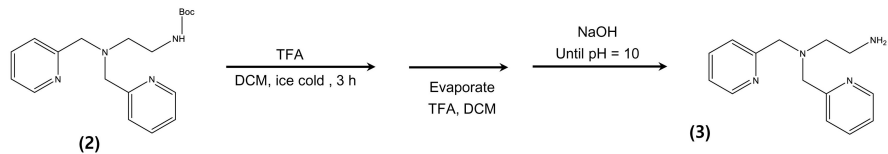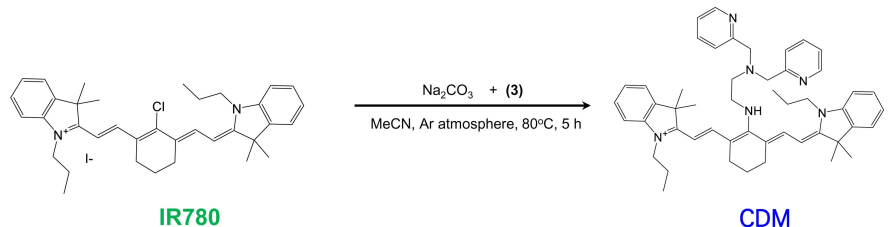

Supplement: d2bm01281b2.pdf [file d2bm01281b2.pdf]

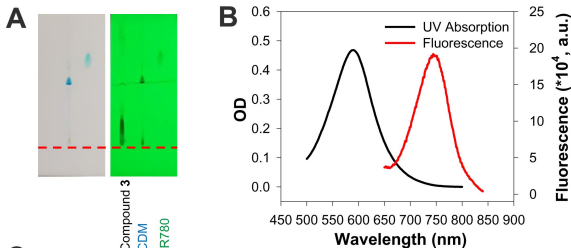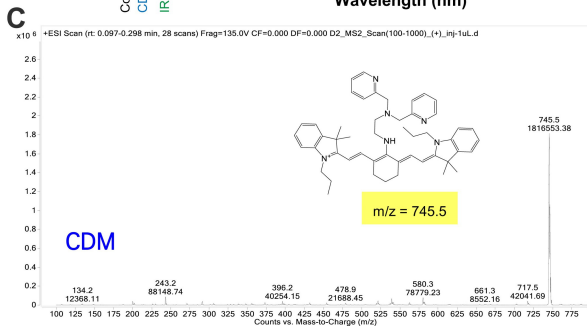

Supplement: d2bm01281b4.pdf [file d2bm01281b4.pdf]

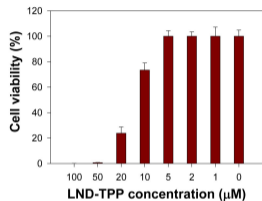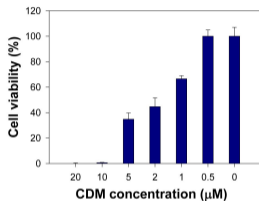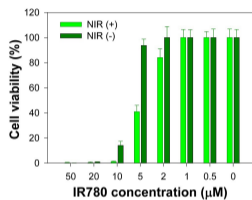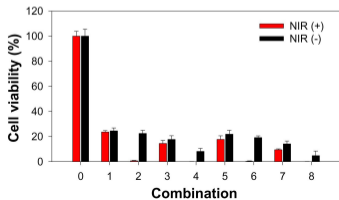

| Combination               | 0 | 1  | 2  | 3  | 4  | 5  | 6  | 7  | 8  |
|---------------------------|---|----|----|----|----|----|----|----|----|
| $C_{\text{LND-TPP}}$ (µM) | 0 | 10 | 10 | 10 | 10 | 12 | 12 | 12 | 12 |
| $C_{\text{CDM}}$ (µM)     | 0 | 1  | 1  | 2  | 2  | 1  | 1  | 2  | 2  |
| $C_{\text{IR780}}$ (µM)   | 0 | 0  | 4  | 0  | 4  | 0  | 4  | 0  | 4  |

Supplement: d2bm01281b6.pdf [file d2bm01281b6.pdf]

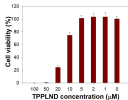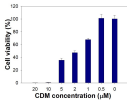

Supplement: d2bm01281b7.pdf [file d2bm01281b7.pdf]

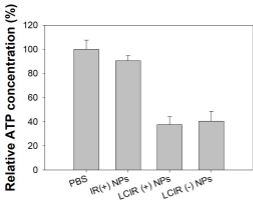

Supplement: d2bm01281b8.pdf [file d2bm01281b8.pdf]

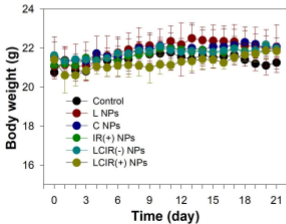

Supplement: d2bm01281b9.pdf [file d2bm01281b9.pdf]
